# Supplementary material
Source: PubMed Central journal article supplement (PMC8734572)
Supplement: ejgh-publish-ahead-of-print-10.1097.meg.0000000000002055-s001.pdf [file ejgh-publish-ahead-of-print-10.1097.meg.0000000000002055-s001.pdf]

**Supplementary Figure 1. Approach used to identify patients with chronic liver disease and cirrhosis.**

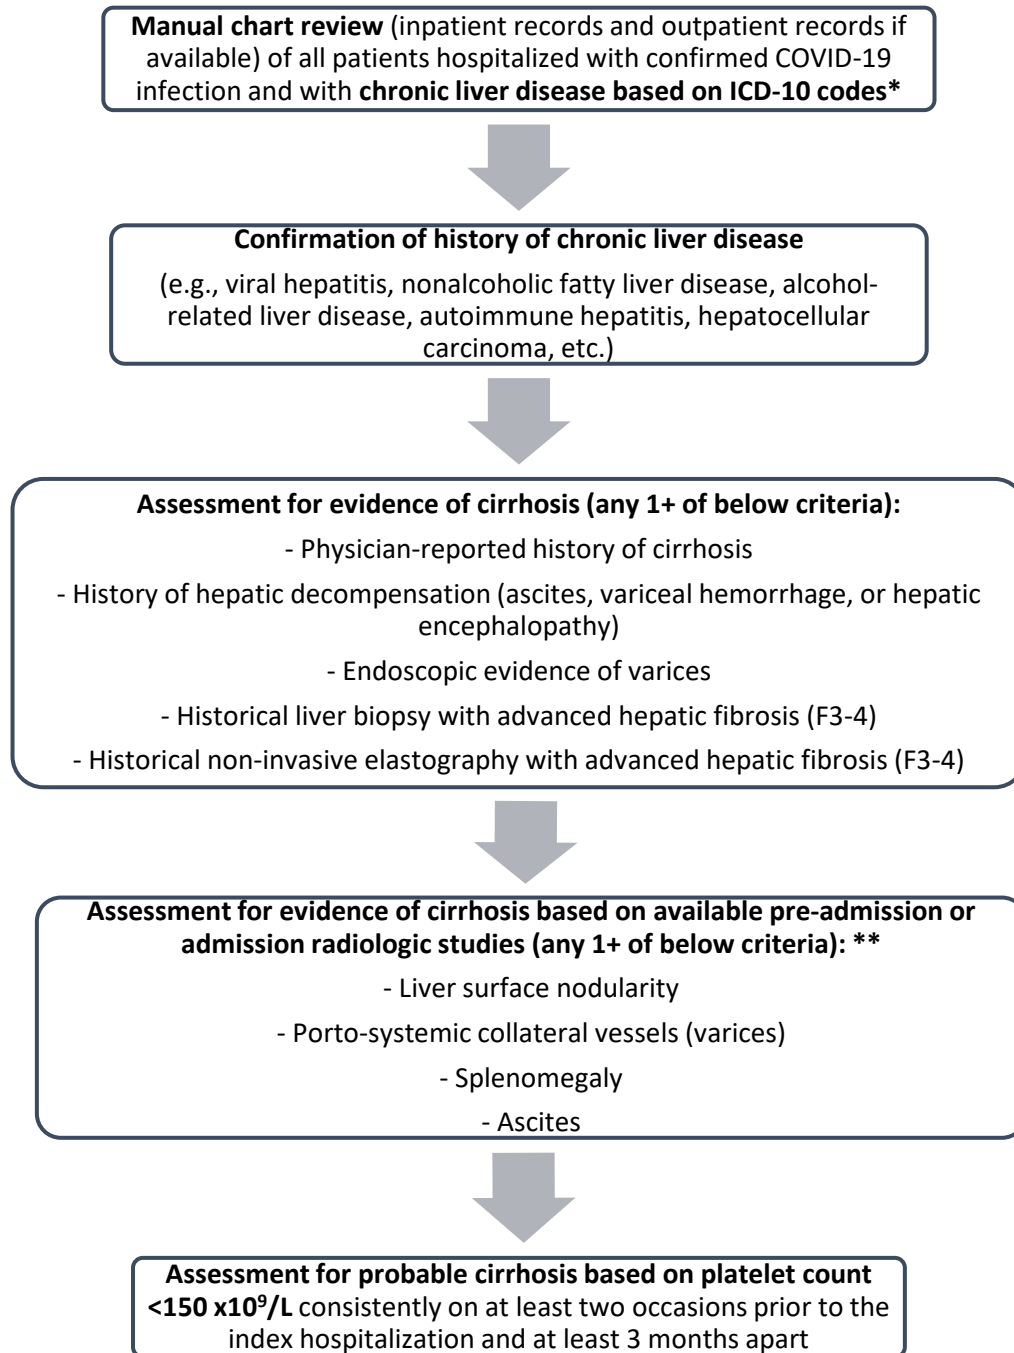

\*ICD-10 diagnostic codes used to screen for chronic liver disease were K70 (alcoholic liver disease), K71 (toxic liver disease), K73 (chronic hepatitis, not elsewhere classified), K74 (fibrosis and cirrhosis of liver), K75 (other inflammatory liver diseases), K76 (other diseases of liver), B18 (chronic viral hepatitis), and B19 (unspecified viral hepatitis).

\*\*Patients with alternate explanations for radiologic findings (such as liver surface nodularity due to hepatic metastases, splenomegaly due to known hematologic disorder, or ascites due to peritoneal carcinomatosis) were not included as having cirrhosis unless they also fulfilled other criteria for cirrhosis.

**Supplementary Figure 2. Correlation of inflammatory markers with AST level in various degrees of LCA.**

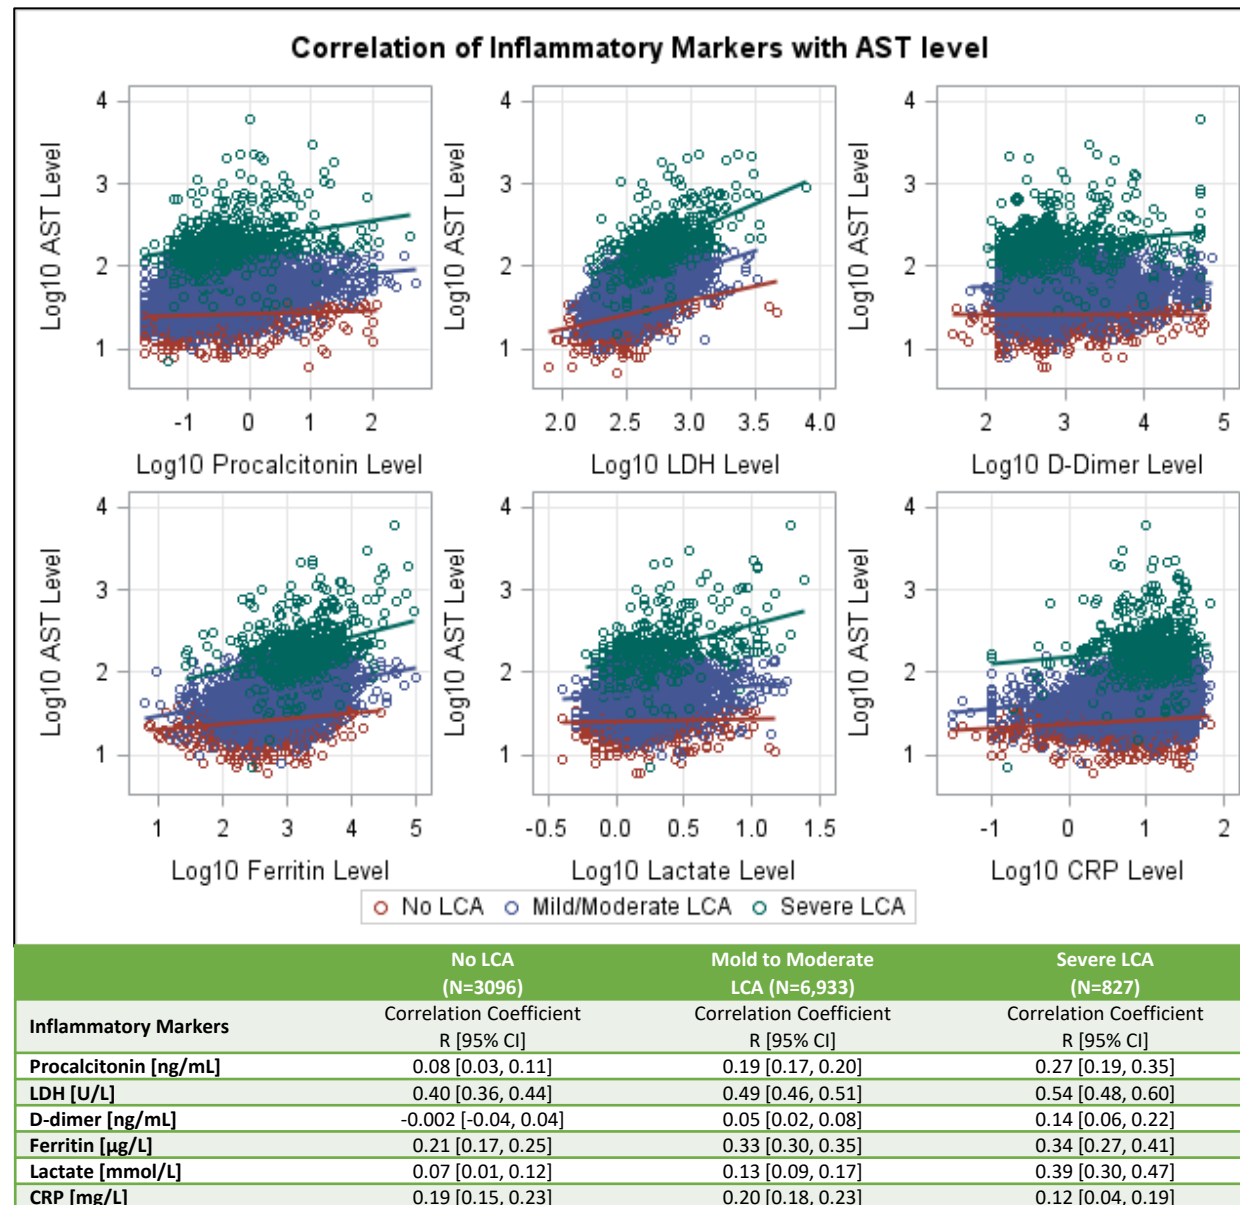

\*Pearson's correlation coefficients [ $r$ ] with [Fisher's  $z$  Transformation] along with 95 % confidence intervals [CI] and significance levels [ $P$  values] were computed to express the of linear association between measures. We defined correlation coefficients as "weak" if  $r=0.10$  to  $0.39$ , "moderate" if  $r=0.4-0.69$ , "strong" if  $r=0.70$  to  $0.89$  and as "very strong" if  $r > 0.9$ .

**Figure 3. Correlation of inflammatory markers with ALT level in various degrees of LCA.**

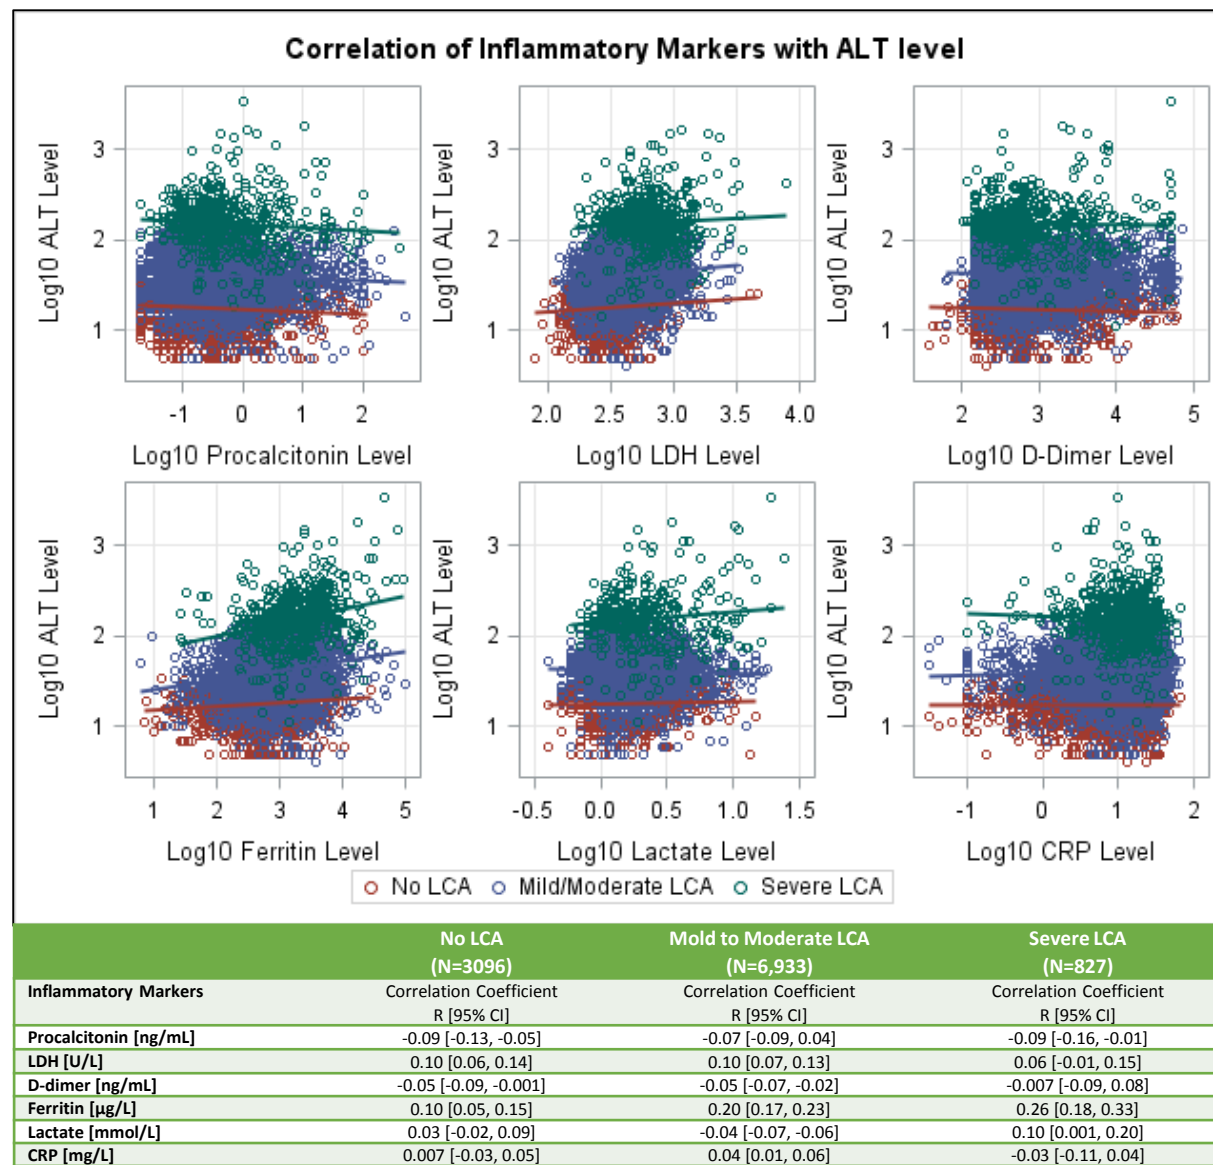

\*Pearson's correlation coefficients [r] with [Fisher's z Transformation] along with 95 % confidence intervals [CI] and significance levels [P values] were computed to express the of linear association between measures. We defined correlation coefficients as “weak” if  $r=0.10$  to  $0.39$ , “moderate” if  $r=0.4-0.69$ , “strong” if  $r=0.70$  to  $0.89$  and as “very strong” if  $r > 0.9$ .

**Supplementary Figure 4. Correlation of CPK with AST and ALT level.**

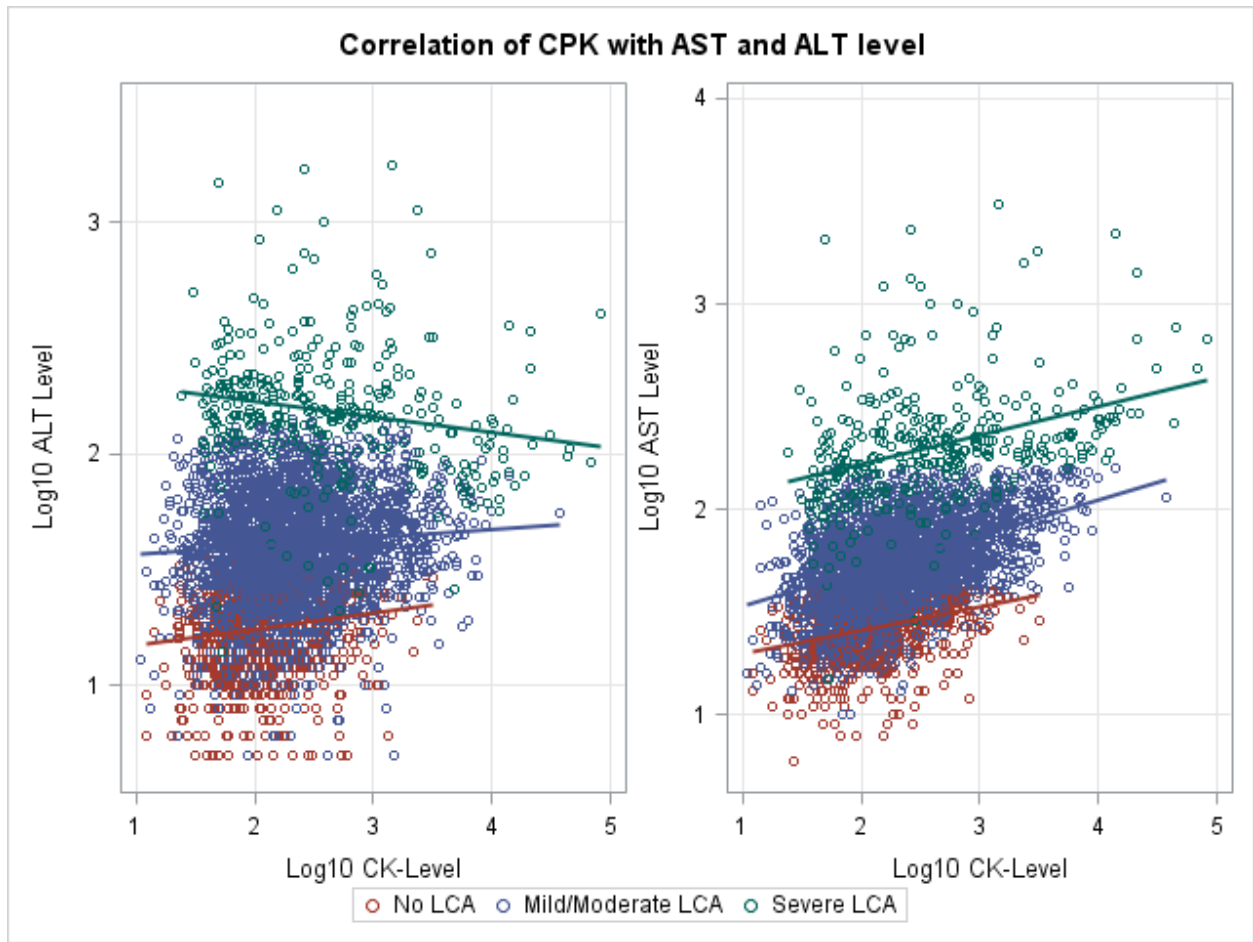

| Inflammatory Markers | With Variable | No LCA<br>[n=3,096]                   |         | Mild to moderate LCA<br>[n=6,933]     |         | Severe LCA<br>[n=827]                 |         |
|----------------------|---------------|---------------------------------------|---------|---------------------------------------|---------|---------------------------------------|---------|
|                      |               | Correlation Coefficient<br>R [95% CI] | P-value | Correlation Coefficient<br>R [95% CI] | P-value | Correlation Coefficient<br>R [95% CI] | P-value |
| CPK                  | AST           | 0.31 [0.26, 0.37]                     | <0.001  | 0.45 [0.42, 0.48]                     | <0.001  | 0.37 [0.27, 0.46]                     | <0.001  |
| CPK                  | ALT           | 0.15 [0.08, 0.21]                     | <0.001  | 0.08 [0.04, 0.11]                     | <0.001  | -0.17 [-0.28, -0.07]                  | 0.0012  |

**Supplementary Table 1: Frequencies of individual liver test elevations in the various LCA groups.**

|                                   |                              |                            |                              |
|-----------------------------------|------------------------------|----------------------------|------------------------------|
|                                   | <b>Bilirubin &lt;1 X ULN</b> | <b>Bilirubin 1-4 x ULN</b> | <b>Bilirubin &gt;4 X ULN</b> |
| <b>Normal(n=3,096)</b>            | 3096(100)                    | 0(0)                       | 0(0)                         |
| <b>Mild to moderate (n=6,933)</b> | 6499(93.74)                  | 434(6.26)                  | 0(0)                         |
| <b>Severe (n=827)</b>             | 718(86.82)                   | 93(11.25)                  | 16(1.93)                     |
|                                   | <b>ALT &lt;1 X ULN</b>       | <b>ALT 1-4 x ULN</b>       | <b>ALT &gt;4 X ULN</b>       |
| <b>Normal(n=3,096)</b>            | 3096(100)                    | 0(0)                       | 0(0)                         |
| <b>Mild to moderate (n=6,933)</b> | 1881(271.13)                 | 5052(72.87)                | 0(0)                         |
| <b>Severe (n=827)</b>             | 20(2.42)                     | 216(26.12)                 | 591(71.46)                   |
|                                   | <b>AST &lt;1 X ULN</b>       | <b>AST 1-4 x ULN</b>       | <b>AST &gt;4 X ULN</b>       |
| <b>Normal(n=3,096)</b>            | 3096(100)                    | 0(0)                       | 0(0)                         |
| <b>Mild to moderate (n=6,933)</b> | 1345(19.40)                  | 5588(80.60)                | 0(0)                         |
| <b>Severe (n=827)</b>             | 13(1.57)                     | 270(32.65)                 | 544(65.78)                   |
|                                   | <b>ALP &lt;1 X ULN</b>       | <b>ALP 1-4 x ULN</b>       | <b>ALP &gt;4 X ULN</b>       |
| <b>Normal(n=3,096)</b>            | 3096(100)                    | 0(0)                       | 0(0)                         |
| <b>Mild to moderate (n=6,933)</b> | 5816(83.89)                  | 1117(16.11)                | 0(0)                         |
| <b>Severe (n=827)</b>             | 511(61.79)                   | 276(33.37)                 | 40(4.84)                     |

Supplementary Table 2. Evaluation of various LCA models predicting in patient mortality using logistic regression analysis.

| ROC Model               | Model Prediction at 1 week |                            |        | Overall Model Prediction |                            |        |
|-------------------------|----------------------------|----------------------------|--------|--------------------------|----------------------------|--------|
|                         | Area                       | 95% Wald Confidence Limits |        | Area                     | 95% Wald Confidence Limits |        |
|                         |                            | LCL                        | UCL    |                          | LCL                        | UCL    |
| <b>AST</b>              | 0.6359                     | 0.6179                     | 0.6540 | 0.5945                   | 0.5814                     | 0.6076 |
| <b>ALT</b>              | 0.4799                     | 0.4612                     | 0.4987 | 0.4793                   | 0.4660                     | 0.4926 |
| <b>Bilirubin</b>        | 0.5739                     | 0.5551                     | 0.5927 | 0.5521                   | 0.5387                     | 0.5656 |
| <b>ALP</b>              | 0.5607                     | 0.5419                     | 0.5795 | 0.5404                   | 0.5270                     | 0.5539 |
| <b>AST-ALT</b>          | 0.7407                     | 0.7242                     | 0.7573 | 0.6750                   | 0.6625                     | 0.6875 |
| <b>AST-BILI</b>         | 0.6386                     | 0.6206                     | 0.6565 | 0.5951                   | 0.5820                     | 0.6083 |
| <b>AST-ALP</b>          | 0.6403                     | 0.6222                     | 0.6585 | 0.5967                   | 0.5836                     | 0.6099 |
| <b>ALT-BILI</b>         | 0.5657                     | 0.5466                     | 0.5848 | 0.5480                   | 0.5344                     | 0.5616 |
| <b>ALT-ALP</b>          | 0.5459                     | 0.5268                     | 0.5650 | 0.5350                   | 0.5215                     | 0.5485 |
| <b>BILI-ALP</b>         | 0.5863                     | 0.5674                     | 0.6052 | 0.5592                   | 0.5456                     | 0.5727 |
| <b>AST-ALT-ALP</b>      | 0.7474                     | 0.7313                     | 0.7634 | 0.6806                   | 0.6683                     | 0.6930 |
| <b>AST-ALT-BILI</b>     | 0.7459                     | 0.7297                     | 0.7622 | 0.6806                   | 0.6682                     | 0.6929 |
| <b>AST-BILI-ALP</b>     | 0.6439                     | 0.6259                     | 0.6619 | 0.5992                   | 0.5860                     | 0.6124 |
| <b>AST-ALP-BILI-ALT</b> | <b>0.7521</b>              | 0.7361                     | 0.7680 | <b>0.6860</b>            | 0.6738                     | 0.6983 |
